# Supplementary material for: Geometrical Stabilities and Electronic Structures of Rh5 Nanoclusters on Rutile TiO2 (110) for Green Hydrogen Production
Source: MDPI journal article supplement (doi:10.3390/nano14020191), 2024-01-15
Supplement: s1 [file s1]

# **Geometrical Stabilities and Electronic Structures of Rh<sub>5</sub> Nanocluster on Rutile TiO<sub>2</sub> (110) for Green Hydrogen Production**

**Moteb Alotaibi**

**Department of Physics, College of Science and Humanities in Al-Kharj, Prince**

**Sattam Bin Abdulaziz University, Al-Kharj 11942, Saudi Arabia;**

**[mot.alotaibi@psau.edu.sa](mailto:mot.alotaibi@psau.edu.sa)**

## 1. $\text{TiO}_2$

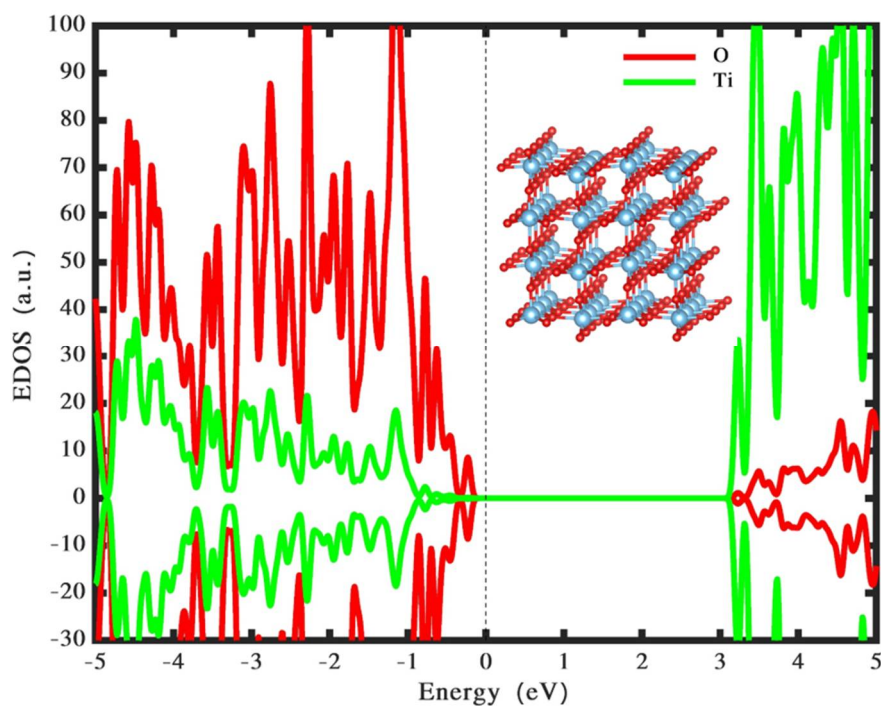

**Figure S1 Density of states of pristine rutile  $\text{TiO}_2$  (110).** The green and red curves show the electronic density of states on titanium and oxygen atoms, respectively. The black vertical dashed line shows the Fermi energy level. Reproduced from our previous calculations [1].

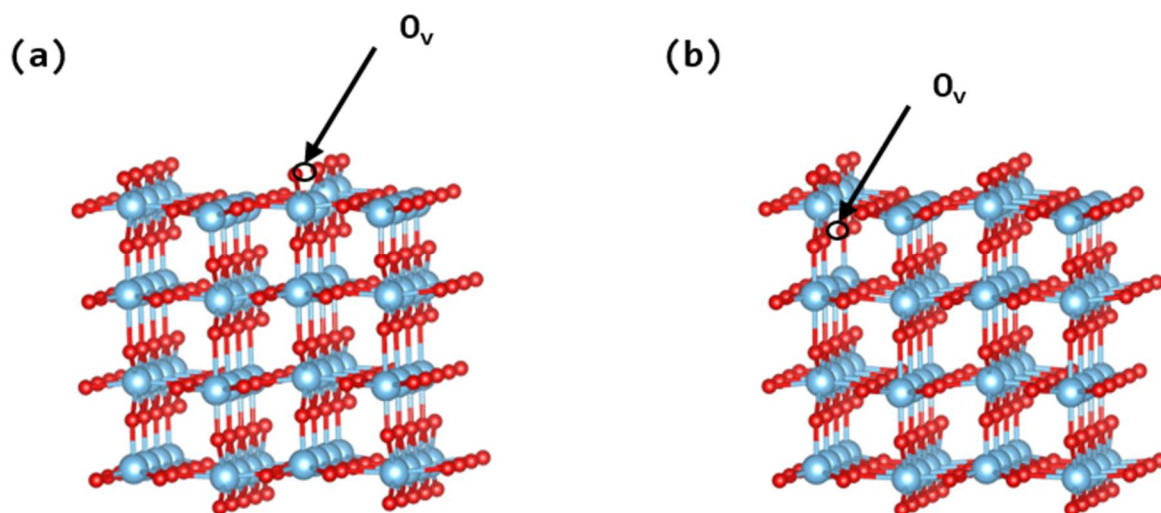

**Figure S2** Oxygen vacancy formation at (a) surface and (b) subsurface locations of  $\text{TiO}_2$  rutile (110). The black circles represent the oxygen vacancy position. Reproduced from our previous calculations [1].

## 2. $\text{Rh}_5@$ reduced $\text{TiO}_2$

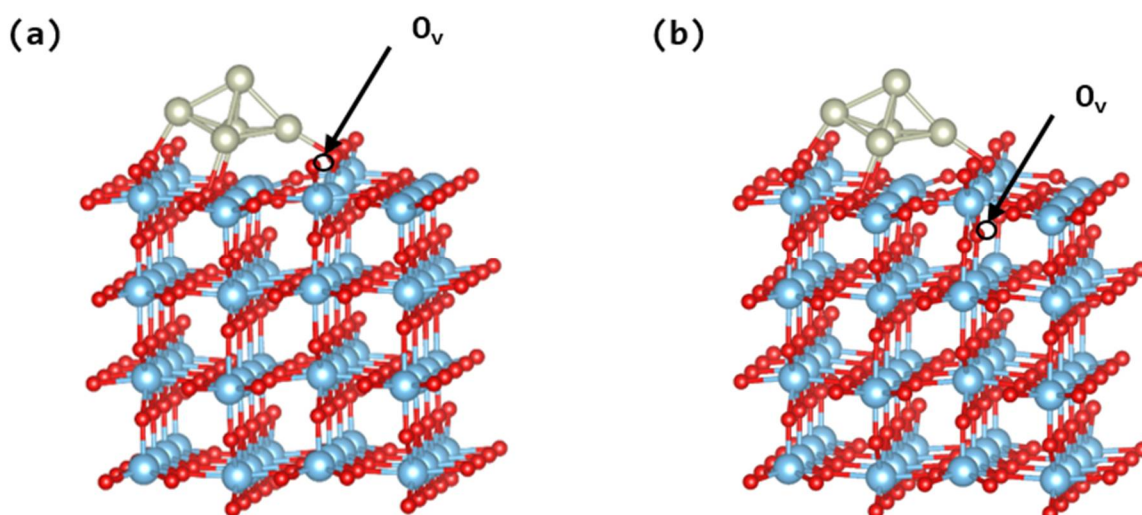

**Figure S3** Oxygen vacancy formation at (a) surface and (b) subsurface locations of  $\text{Rh}_5@$  $\text{TiO}_2$  rutile (110). The black circles represent the oxygen vacancy position.

**Table S1** Comparisons of formation energies of oxygen vacancy.

| Structure                               | (a) In Figure S2 | (b) In Figure S2 | (a) In Figure S3 | (b) In Figure S3 |
|-----------------------------------------|------------------|------------------|------------------|------------------|
| Formation energy of oxygen vacancy (eV) | 4.07             | 4.65             | 4.50             | 4.82             |

## Reference

- [1] M. Alotaibi, Q. Wu, and C. Lambert, "Computational Studies of Ag 5 Atomic Quantum Clusters Deposited on Anatase and Rutile TiO<sub>2</sub> Surfaces," *Appl Surf Sci*, p. 156054, 2022, doi: 10.1016/j.apsusc.2022.156054.
